# Supplementary material for: Lewis acidic ionic liquids of crown ether complex cations: preparation and applications in organic reactions
Source: Royal Society of Chemistry journal article supplement (doi:10.1039/c6ra21947k), 2016-01-01
Supplement: c6ra21947k1.pdf [file c6ra21947k1.pdf]

Supporting Information

**Lewis acidic ionic liquids of crown ether complex cations:  
preparation and applications in organic reactions**

Yatao Liang, Jinyuan Wang, Chen Cheng, Huangwang Jing\*

**Table of contents**

|                                                                             |         |
|-----------------------------------------------------------------------------|---------|
| 1. Characterization data of Lewis acidic ionic liquids and target compounds | s2-s3   |
| 2. FT-IR , MS , TGA-DSC of Lewis acidic ionic liquids                       | s4-s18  |
| 3. <sup>1</sup> H NMR spectra of target compounds                           | s19-s20 |

## ***1. Characterization data of Lewis acidic ionic liquids and part compounds***

### *1.1 The data of Lewis acidic ionic liquids*

**[18-C-6K][AlCl<sub>4</sub>] (A)** FT-IR (cm<sup>-1</sup>) 3427.8 (m), 2916.5 (m), 1476.0 (w), 1353.5 (w), 1115.4 (s), 945.6 (m); Raman (cm<sup>-1</sup>): 359; Elemental analysis calcd for C<sub>12</sub>H<sub>24</sub>Cl<sub>4</sub>AlKO<sub>6</sub>·CH<sub>3</sub>CH<sub>2</sub>OH·H<sub>2</sub>O (%): C 31.36, H 6.01 found: C 31.70, H 6.342; MS (ESI) m/z: calcd for [M]<sup>-</sup> 168.79, found 168.86.

**[18-C-6K][FeCl<sub>4</sub>] (B)** FT-IR (cm<sup>-1</sup>) 3431.0 (m), 2896.4 (m), 1634.5 (w), 1351.2 (w), 1105.1 (s), 961.8 (m); Raman (cm<sup>-1</sup>): 332; Elemental analysis calcd for C<sub>12</sub>H<sub>24</sub>Cl<sub>4</sub>FeKO<sub>6</sub>·H<sub>2</sub>O·CH<sub>2</sub>Cl<sub>2</sub> (%): C 25.85, H 4.67 found: C 25.81, H 4.613; MS (ESI) m/z: calcd for [M]<sup>-</sup> 197.66, found 197.85.

**[18-C-6K][ZnCl<sub>3</sub>] (C)** FT-IR (cm<sup>-1</sup>) 3412.9 (m), 2899.7 (m), 1648.8 (w), 1353.6 (w), 1110.3 (s), 962.8 (m); Raman (cm<sup>-1</sup>): 289; Elemental analysis calcd for C<sub>12</sub>H<sub>24</sub>Cl<sub>3</sub>ZnKO<sub>6</sub> (%)·CH<sub>3</sub>CH<sub>2</sub>OH·H<sub>2</sub>O: C 31.18, H 5.98 found: C 30.82, H 5.751; MS (ESI) m/z: calcd for [M]<sup>-</sup> 171.75, found 170.87.

[15-C-5Na][FeCl<sub>4</sub>] (D) FT-IR (cm<sup>-1</sup>) 3429.0 (m), 2922.7 (m), 1475.0 (w), 1353.2 (w), 1117.2 (s), 947.9 (w); Raman (cm<sup>-1</sup>): 329; Elemental analysis calcd for C<sub>10</sub>H<sub>20</sub>Cl<sub>4</sub>FeNaO<sub>5</sub> (·2H<sub>2</sub>O): C 25.18, H 5.07 found C 25.31, H 5.22; MS (ESI) m/z: calcd [M]<sup>-</sup> 197.66, found 197.83.

[15-C-5Na][ZnCl<sub>3</sub>] (E) FT-IR (cm<sup>-1</sup>) 3441.1 (m), 2922.1 (m), 1477.8 (w), 1352.4 (w), 1113.6 (s), 946.3 (m); Raman (cm<sup>-1</sup>): 287; Elemental analysis calcd for C<sub>10</sub>H<sub>20</sub>Cl<sub>3</sub>ZnNaO<sub>5</sub>·1/3CH<sub>3</sub>CH<sub>2</sub>OH (%): C 29.77, H 5.15 found: C 30.03, H 4.75; MS (ESI) m/z: calcd for [M]<sup>-</sup> 170.75, found 170.87.

[18-C-6K]<sup>+</sup> MS (ESI) m/z: calcd for [M]<sup>+</sup>303.12, found 303.11.

[15-C-5Na]<sup>+</sup> MS (ESI) m/z: calcd for [M]<sup>+</sup> 243.12, found 243.09.

### 1.2 <sup>1</sup>H NMR data of target compounds

2-phenyl-1H-benzo[d]imidazole (**3a**) <sup>1</sup>H NMR (300 MHz, DMSO-*d*<sub>6</sub>) δ = 12.94(s, 1H), 8.19 (d, *J*=7.1Hz 1H), 7.80-7.33(m, 3H), 7.22 (dd, *J*=6.0, 2.8Hz, 1H) ppm;

1-benzyl-2-phenyl-1H-benzo[d]imidazole (**4a**) <sup>1</sup>H NMR (300 MHz, DMSO-*d*<sub>6</sub>) δ = 10.83 (s, 1H), 7.37 (dd, *J*=10.0, 4.8 Hz, 1H), 7.27 (t, *J* = 7.5Hz, 1H), 7.18 (d, *J*=7.3, 1H), 7.07-6.99 (m, 1H), 5.84(s, 1H) ppm;

3,3'-(phenylmethylene)bis(1H-indole) (**6a**) <sup>1</sup>H NMR (300 MHz, CDCl<sub>3</sub>) δ = 7.89 (d, *J* = 8.4Hz, 1H), 7.70 (dd, *J* = 6.9, 1.8Hz, 2H), 7.48 (m, 3H), 7.33 (m, 4H), 7.24 (dd, *J* = 6.6, 1.2Hz, 2H), 7.12 (dd, *J*=8.4, 2.4Hz, 2H), 5.47 (s, 2H);

## 2. FT-IR, MS, TGA-DSC of Lewis acidic ionic liquids

### 2.1 FT-IR of Lewis acidic ionic liquids

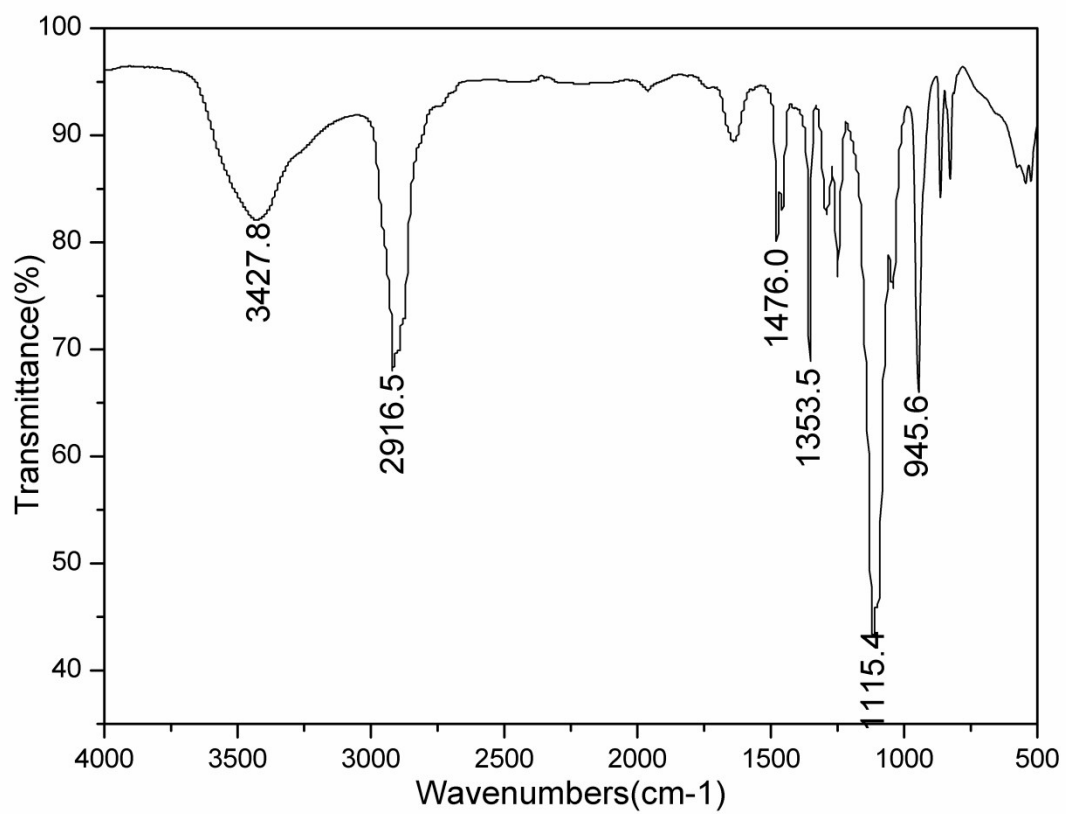

Figure S1 IR spectrum of A

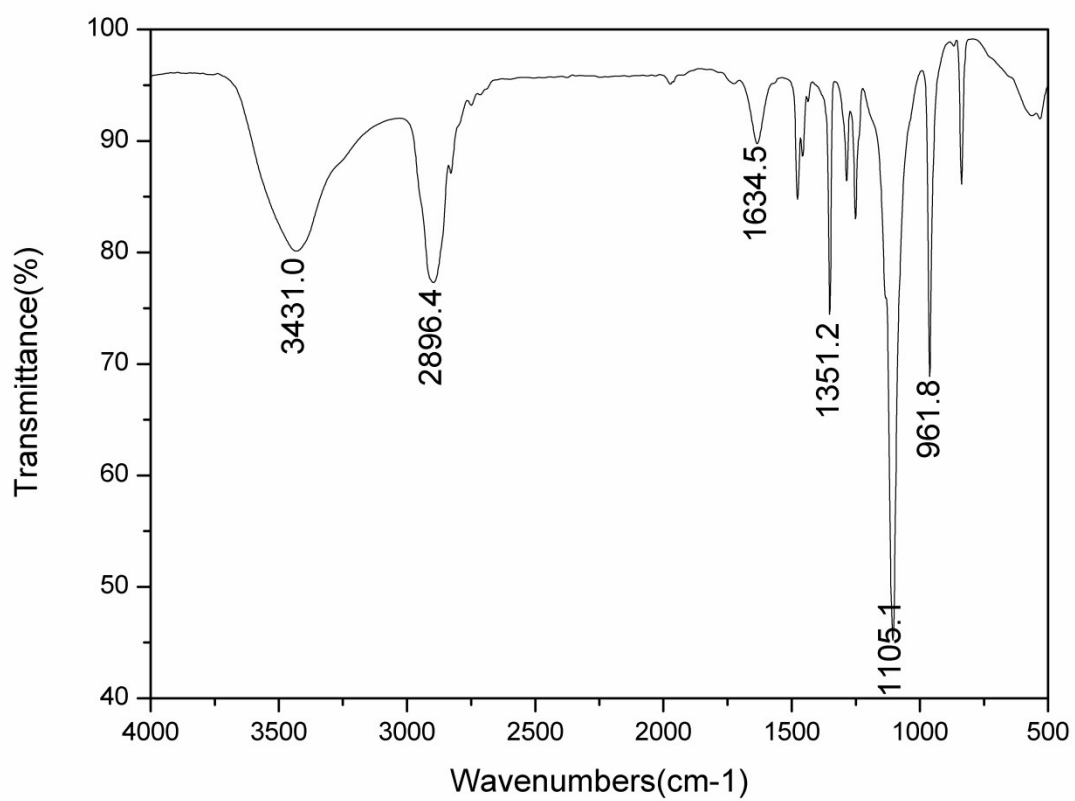

Figure S2 IR spectrum of B

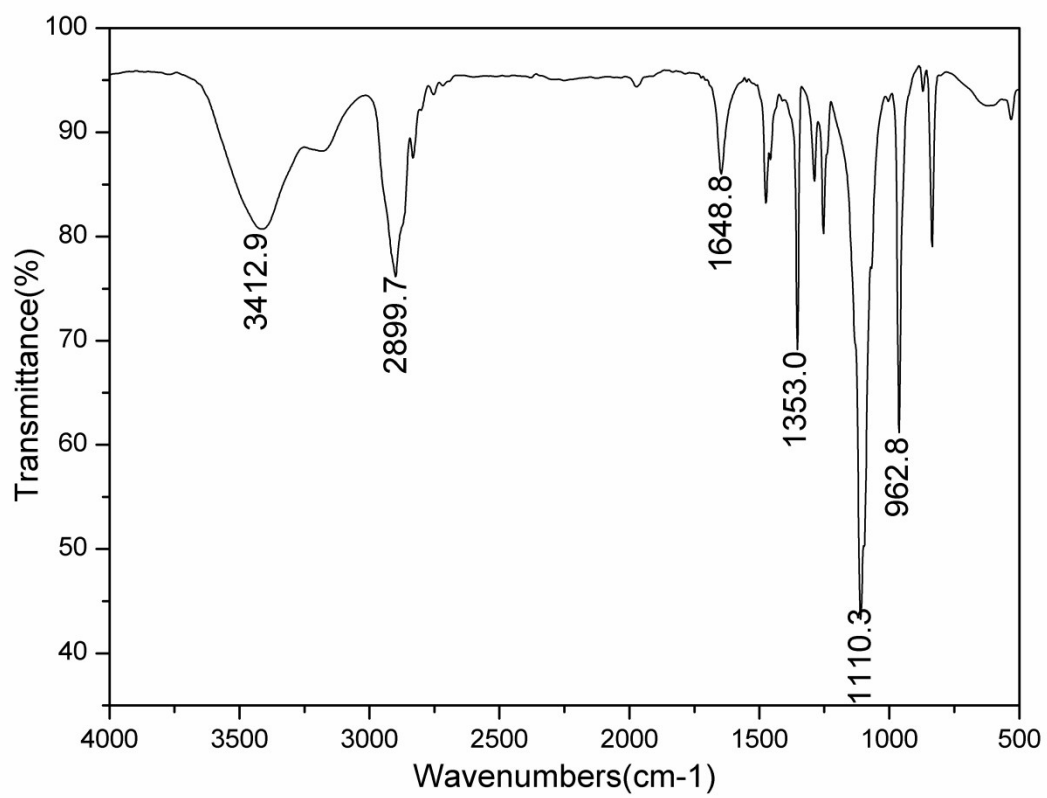

Figure S3 IR spectrum of C

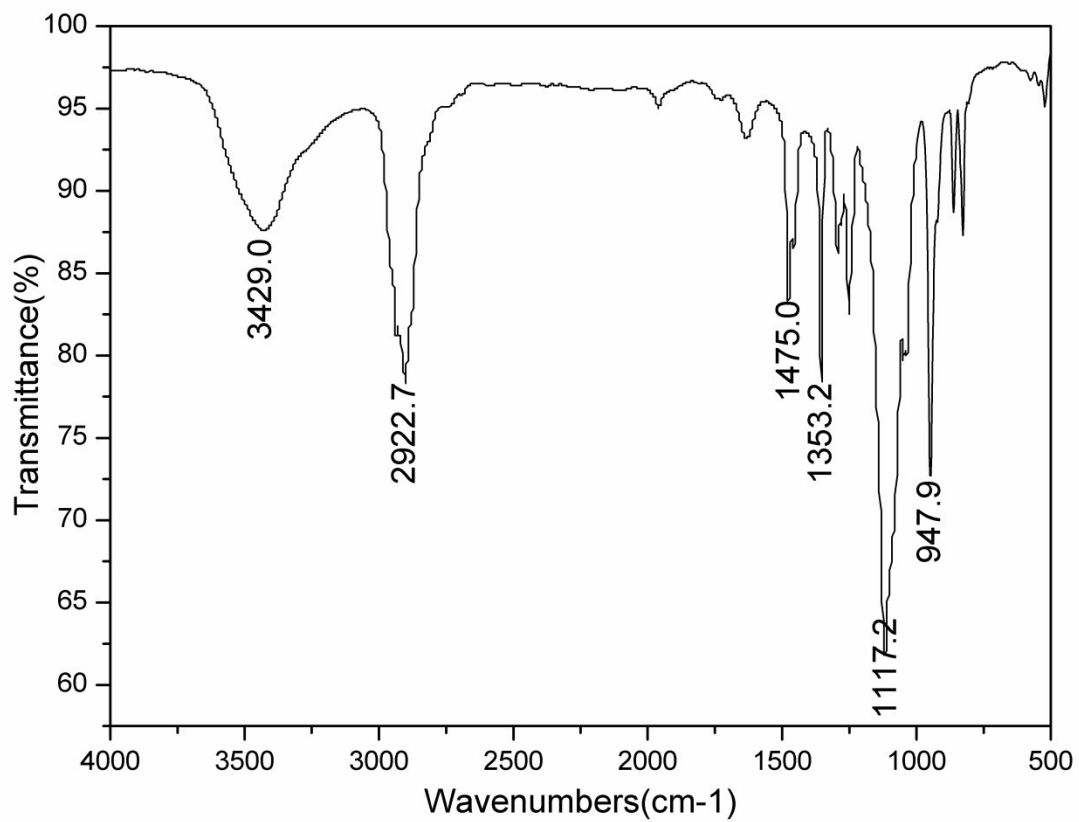

**Figure S4 IR spectrum of D**

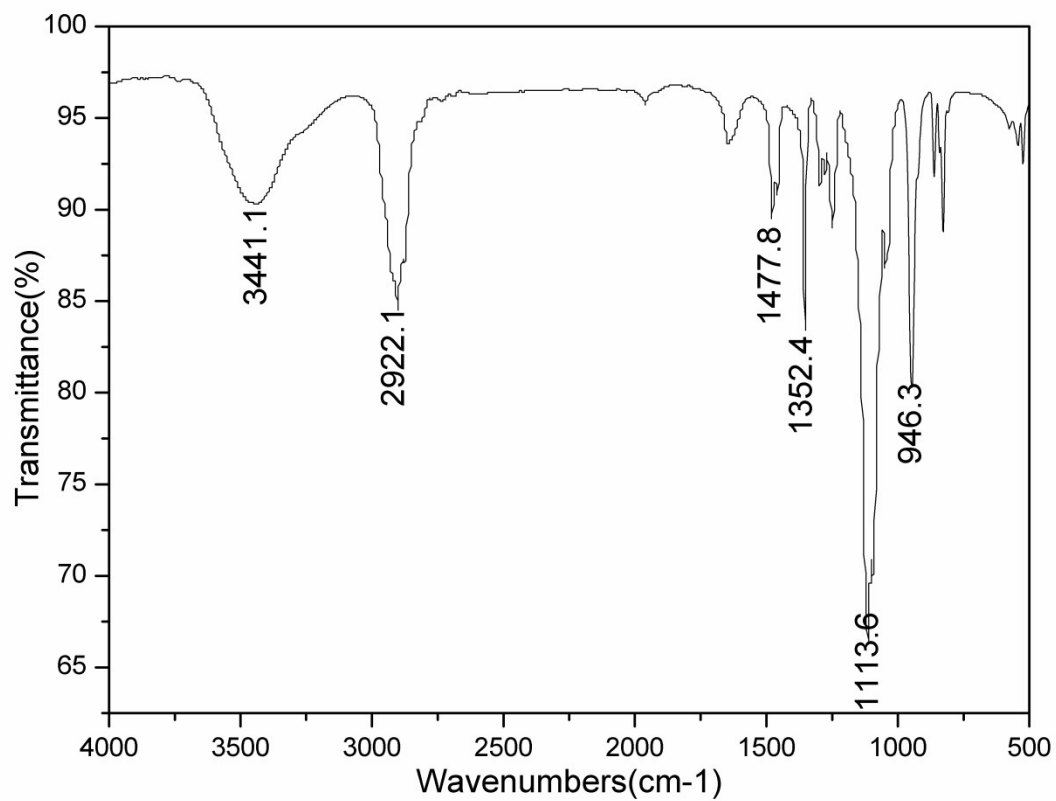

Figure S5 IR spectrum of E



## *2.2 MS of Lewis acidic ionic liquids*

# Generic Display Report

Analysis Info  
Analysis Name D:\Data\YANGY\NewLIANGYATAO140312.d  
Method tune\_low\_20130705.m  
Sample Name DEFAULT  
Comment

Acquisition Date 3/12/2014 4:43:08 PM  
Operator BDAL@DE  
Instrument micrOTOF

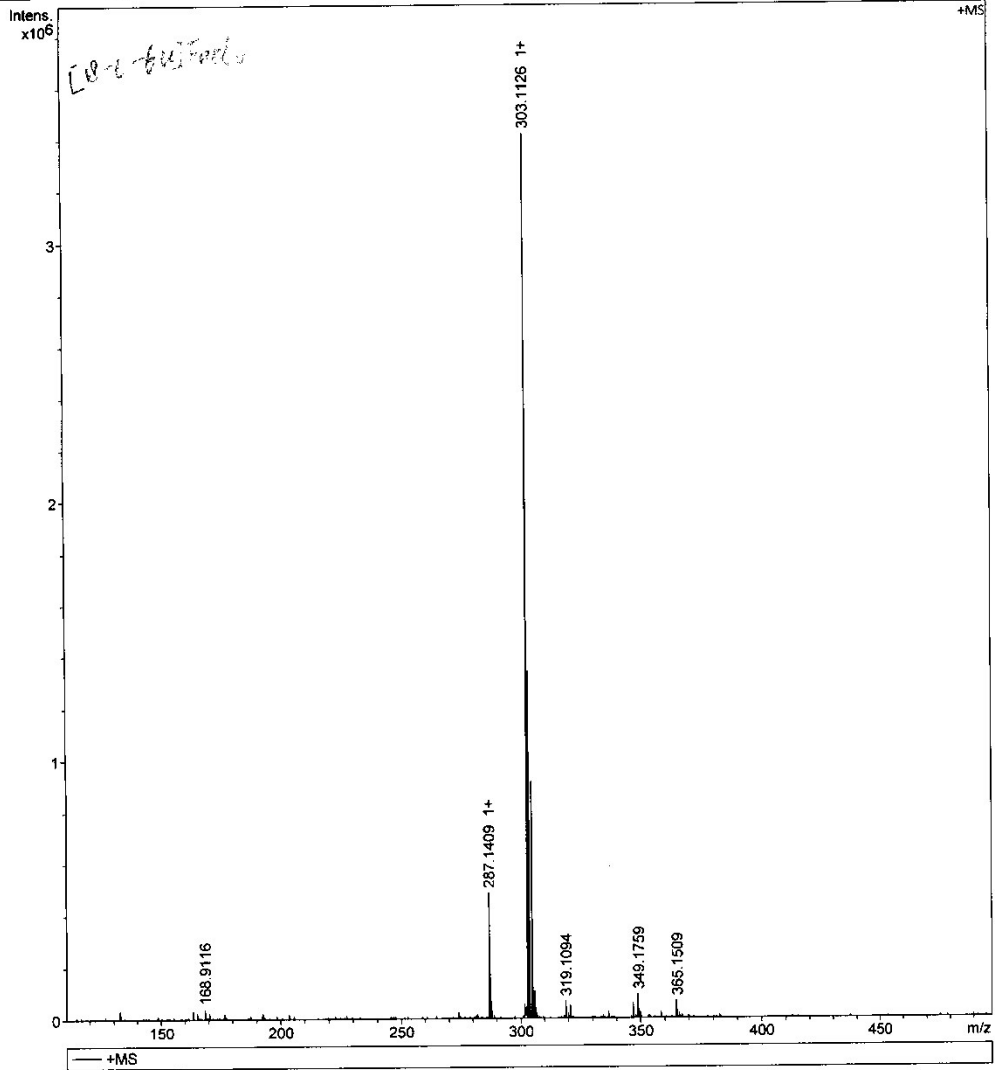

Figure S6 MS of IL catalyst cation [18-C-6K]<sup>+</sup>

# Generic Display Report

## Analysis Info

Analysis Name D:\Data\YANGY\NewWANGKAI140313.d  
Method tune\_low\_20130705.m  
Sample Name DEFAULT  
Comment

Acquisition Date 3/13/2014 3:38:48 PM

Operator BDAL@DE  
Instrument micrOTOF

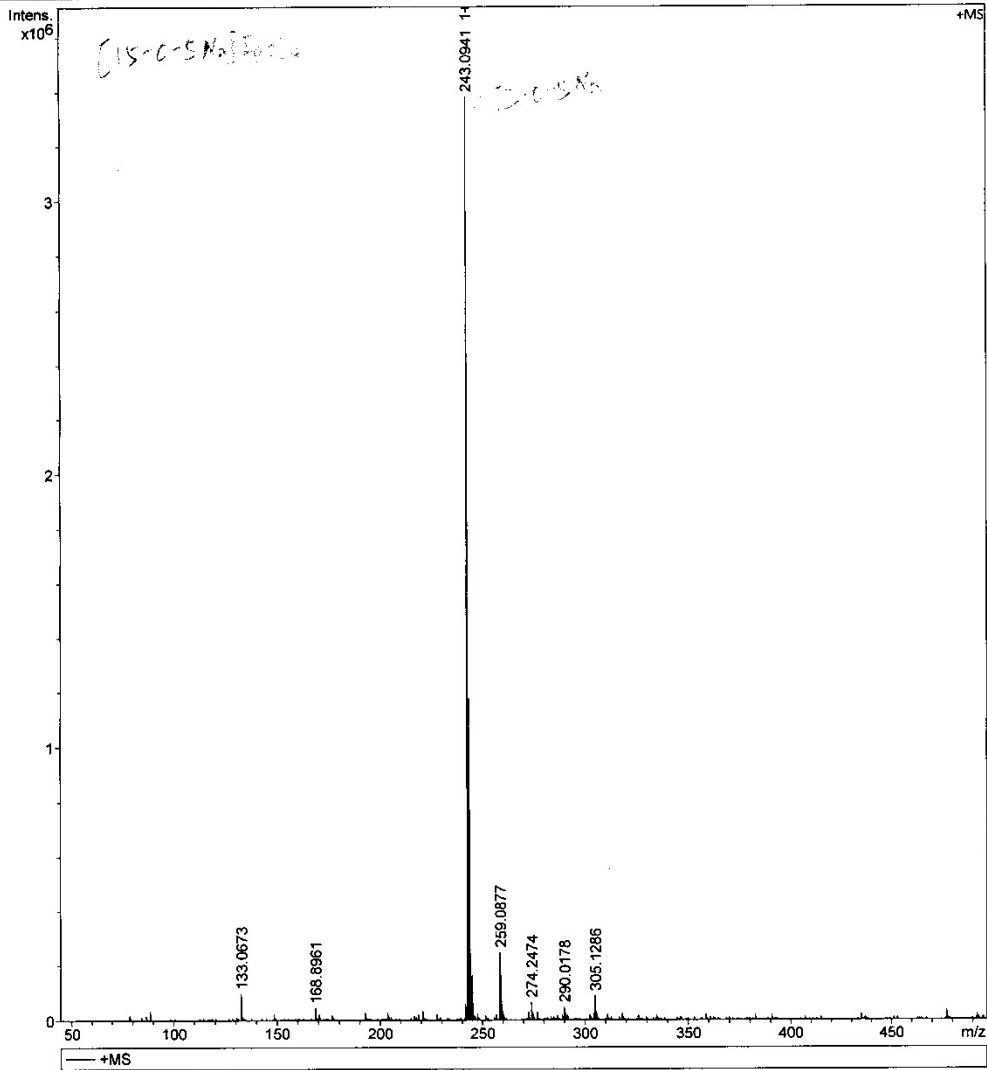

Figure S7 MS of IL catalyst cation [15-C-5Na]<sup>+</sup>

# Generic Display Report

## Analysis Info

Analysis Name D:\Data\YANGYNew\LIANGYATAO140627.d  
Method tune\_low\_20130705.m  
Sample Name DEFAULT  
Comment

Acquisition Date 6/27/2014 4:23:48 PM

Operator BDAL@DE  
Instrument microTOF

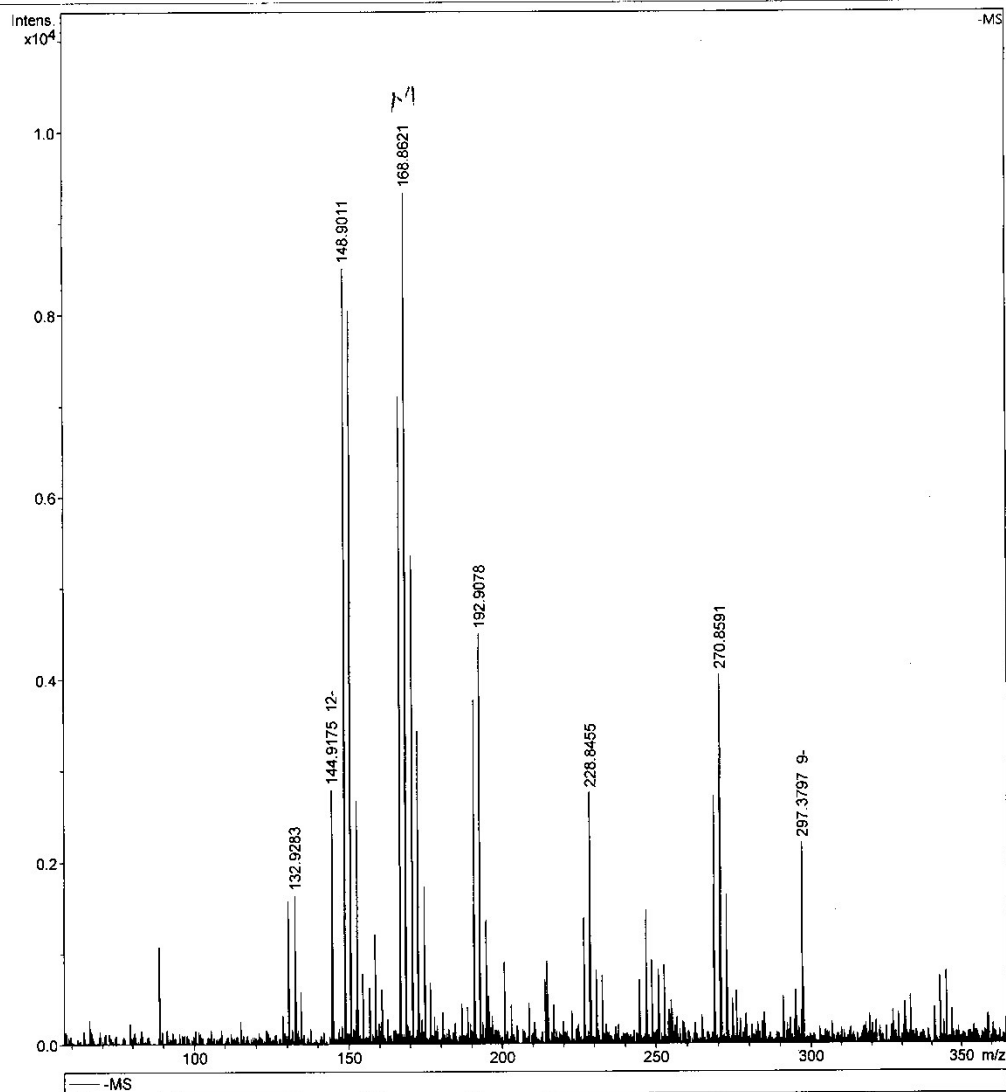

Figure S8 MS of A anion [AlCl<sub>4</sub>]<sup>-</sup>

# Generic Display Report

## Analysis Info

Analysis Name D:\Data\YANGY\New\LIANGYATAO\140624.d  
Method tune\_low\_20130705.m  
Sample Name DEFAULT  
Comment 18-C-6K3Fe

Acquisition Date 6/24/2014 5:10:44 PM

Operator BDAL@DE  
Instrument micrOTOF

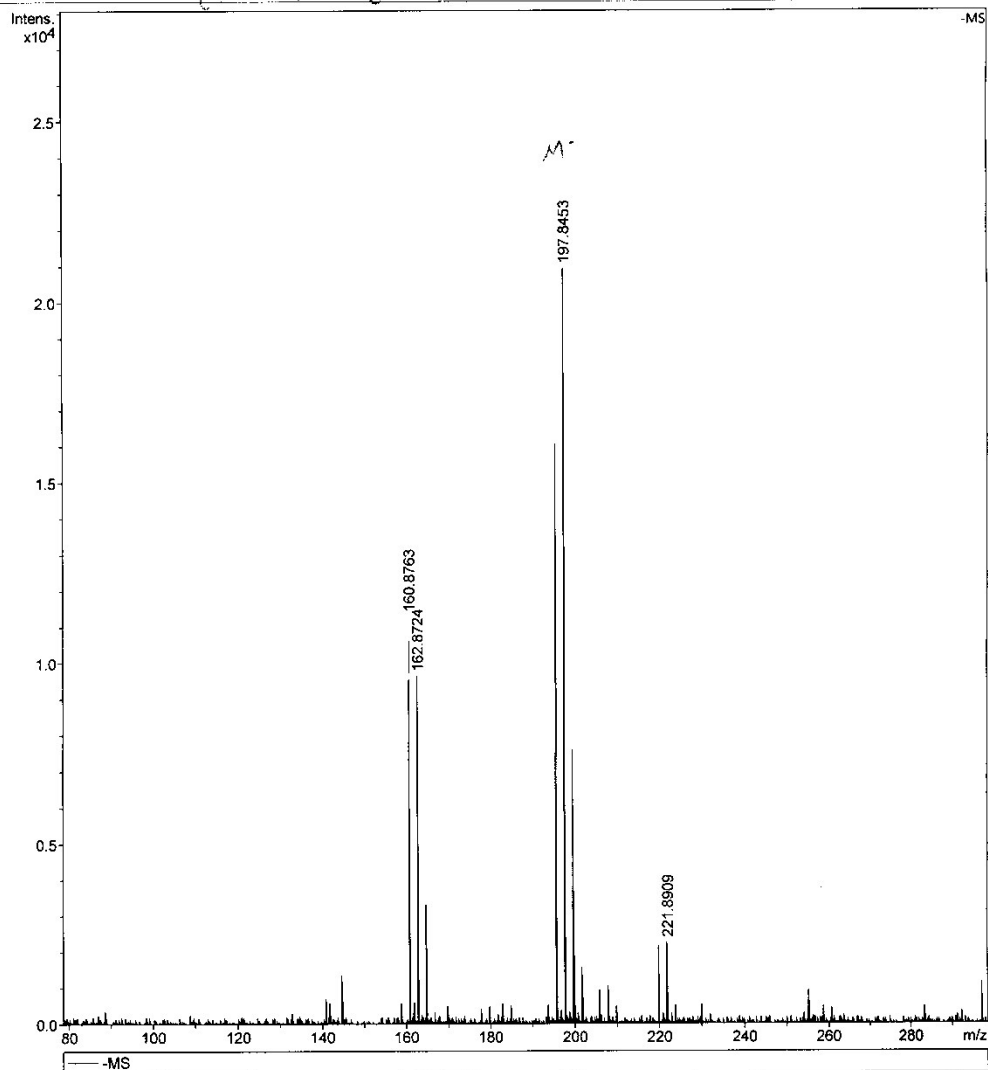

Figure S9 MS of B anion [FeCl<sub>4</sub>]<sup>-</sup>

# Generic Display Report

## Analysis Info

Analysis Name D:\Data\YANGY\NewLIANGYATAO140626.d  
Method tune\_low\_20130705.m  
Sample Name DEFAULT  
Comment 18-c-6x 2nd<sub>2</sub>

Acquisition Date 6/26/2014 4:54:12 PM

Operator BDAL@DE  
Instrument micrOTOF

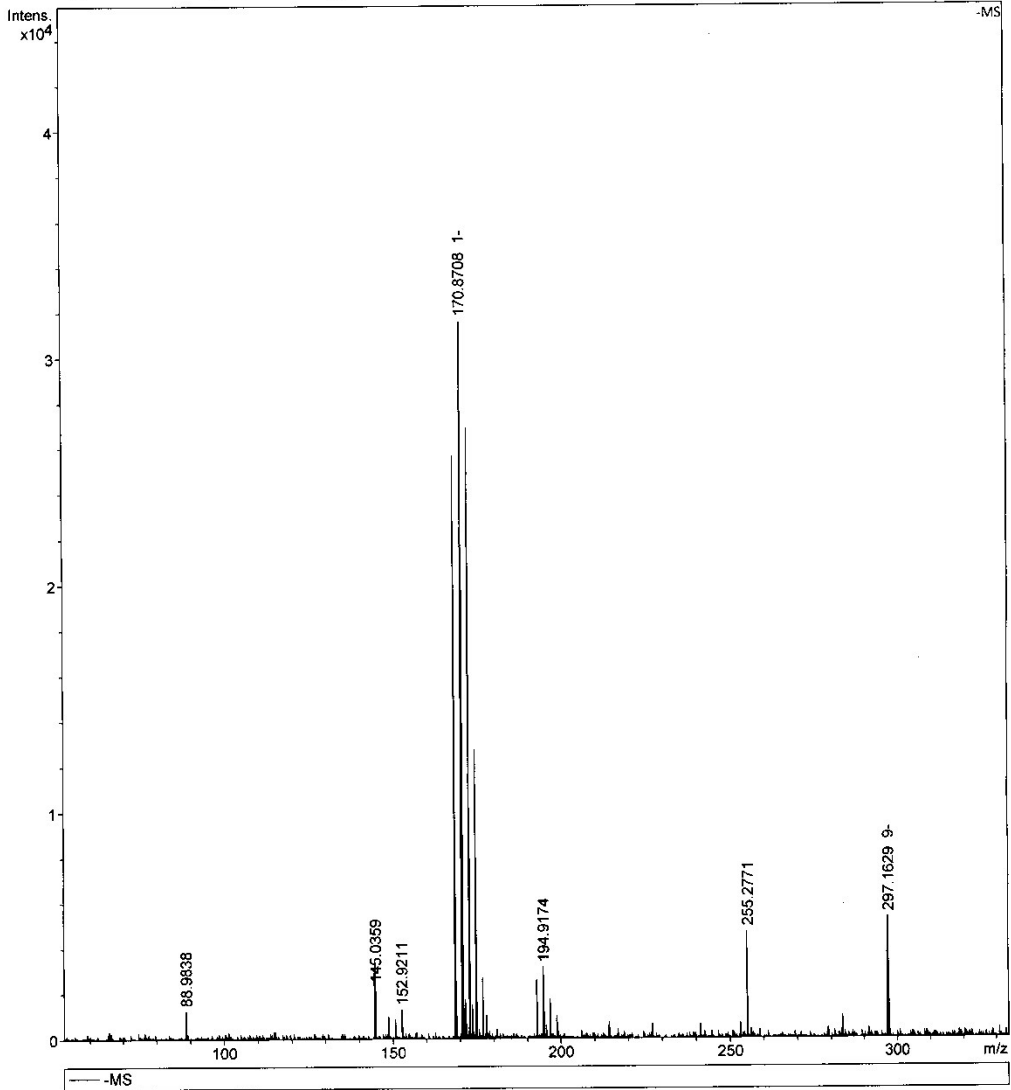

Figure S10 MS of C anion  $[\text{ZnCl}_3]^-$

Generic Display Report

|                                                   |                                       |
|---------------------------------------------------|---------------------------------------|
| <b>Analysis Info</b>                              | Acquisition Date 6/25/2014 4:48:55 PM |
| Analysis Name D:\Data\YANGYNew\LIANGYATAO140625.d | Operator BDAL@DE                      |
| Method tune_low_20130705.m                        | Instrument micrOTOF                   |
| Sample Name DEFAULT                               |                                       |
| Comment                                           |                                       |

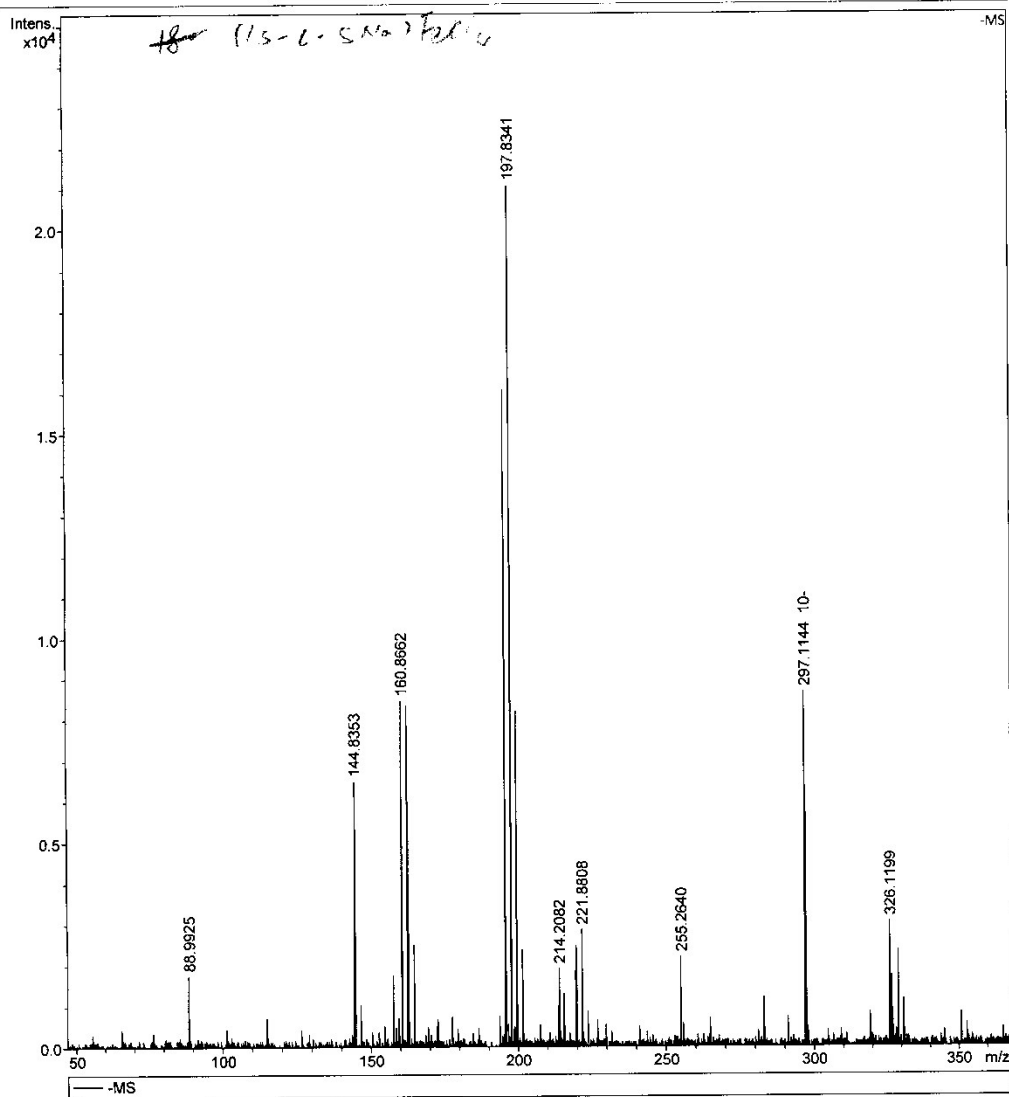

Figure S11 MS of D anion  $[\text{FeCl}_4]^-$

# Generic Display Report

## Analysis Info

Analysis Name D:\Data\YANGYNew\WANGKAI140626.d  
Method tune\_low\_20130705.m  
Sample Name DEFAULT  
Comment 15-C-SMA-1115

Acquisition Date 6/26/2014 4:57:37 PM

Operator BDAL@DE  
Instrument micrOTOF

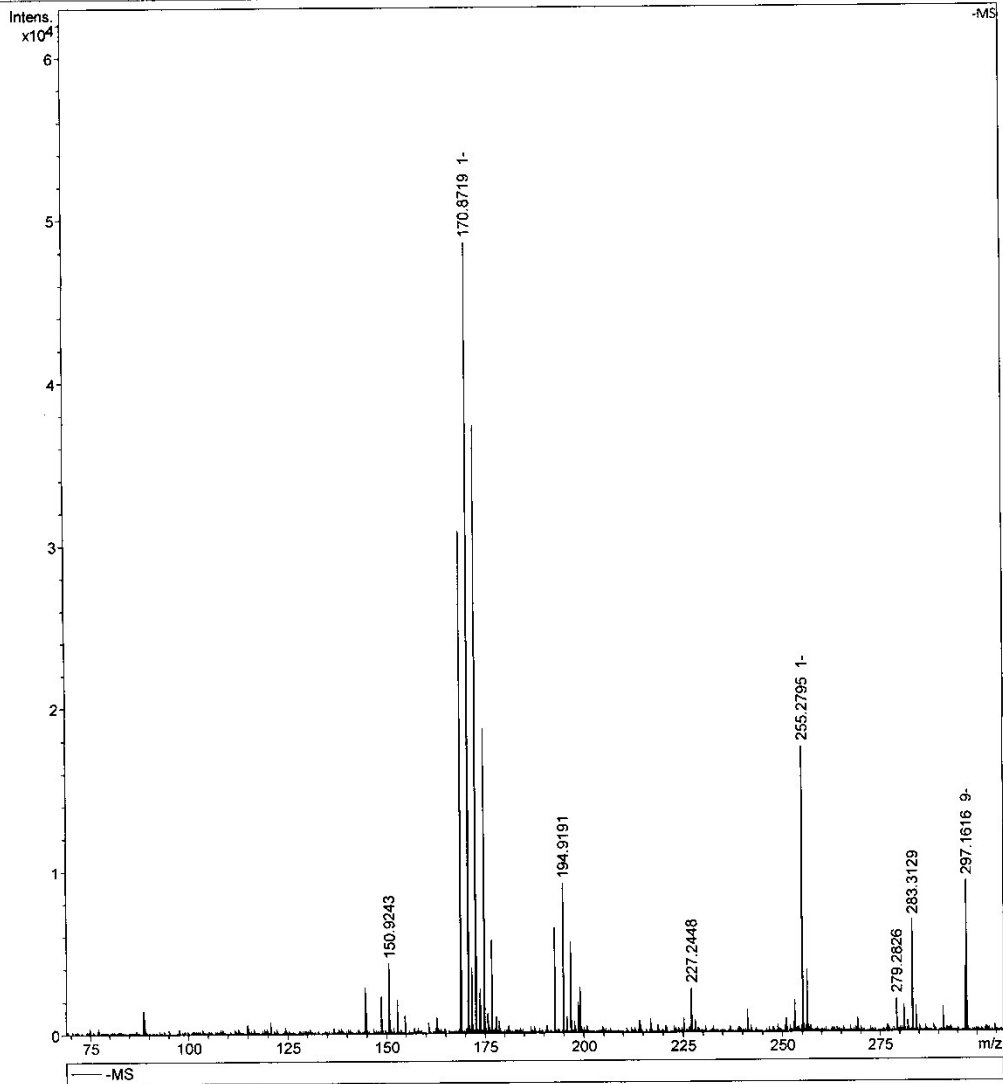

Figure S12 MS of E anion  $[\text{ZnCl}_3]^-$



### 2.3 TGA-DSC of Lewis acidic ionic liquids

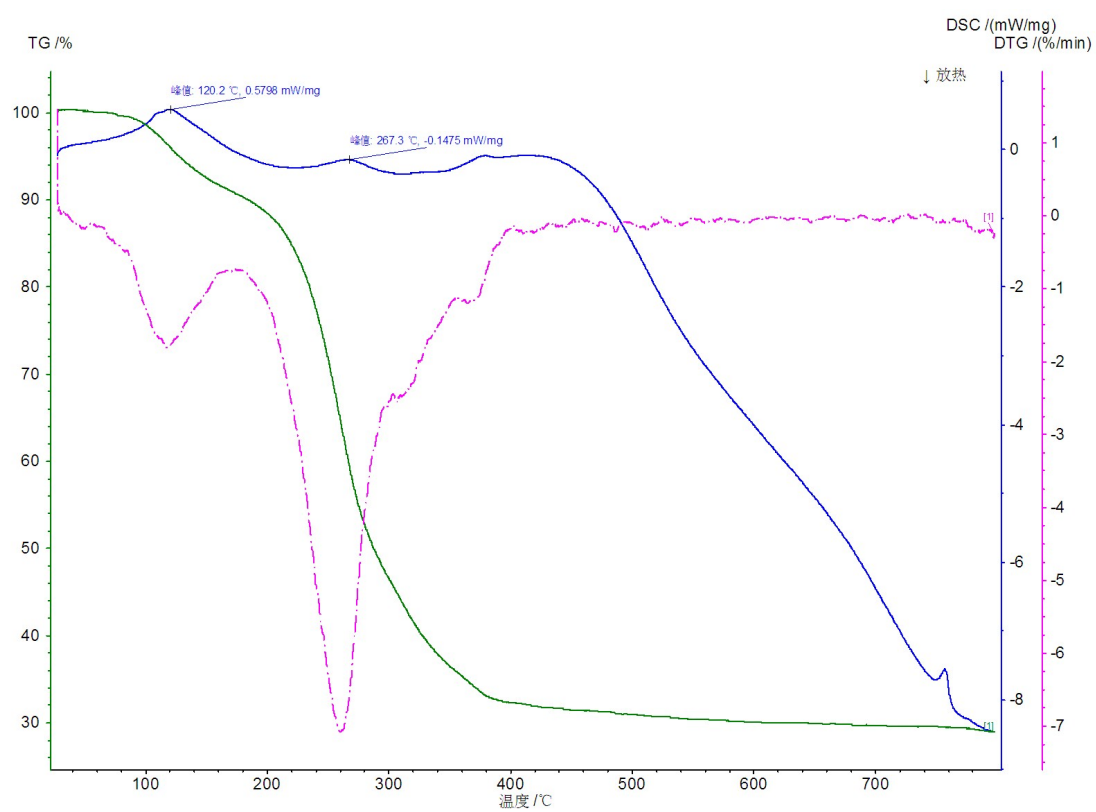

Figure S13 TGA-DSC of A

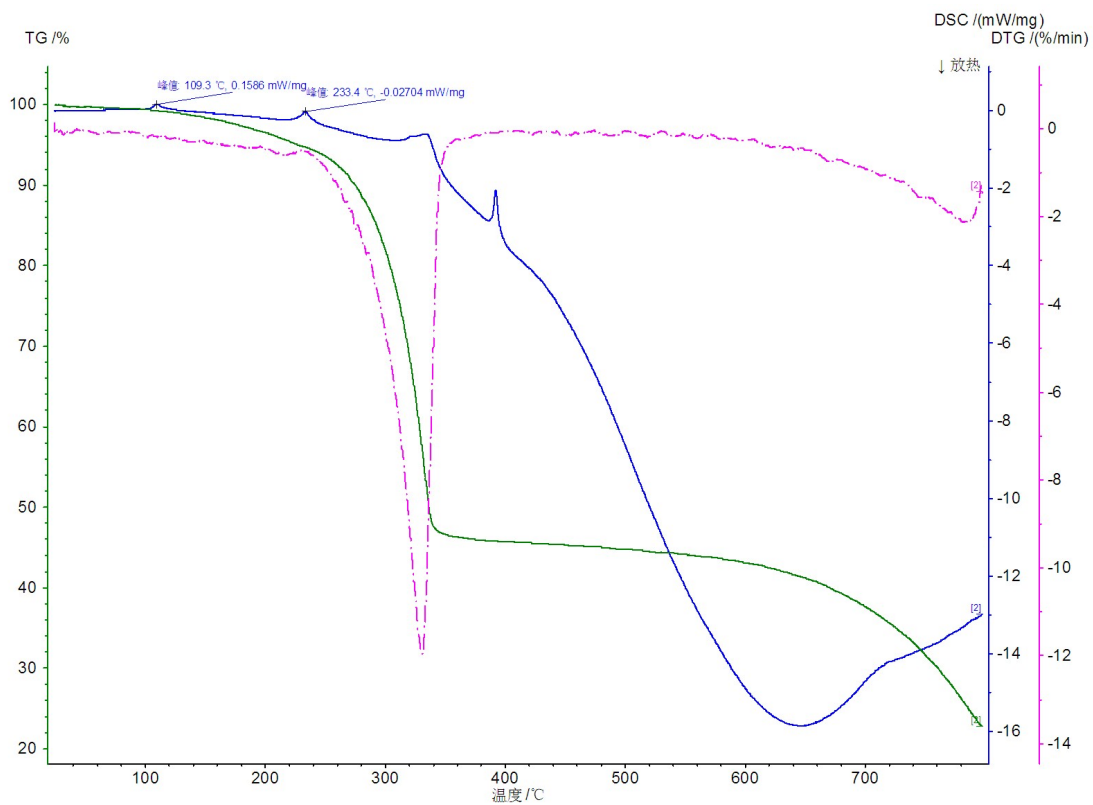

Figure S14 TGA-DSC of B

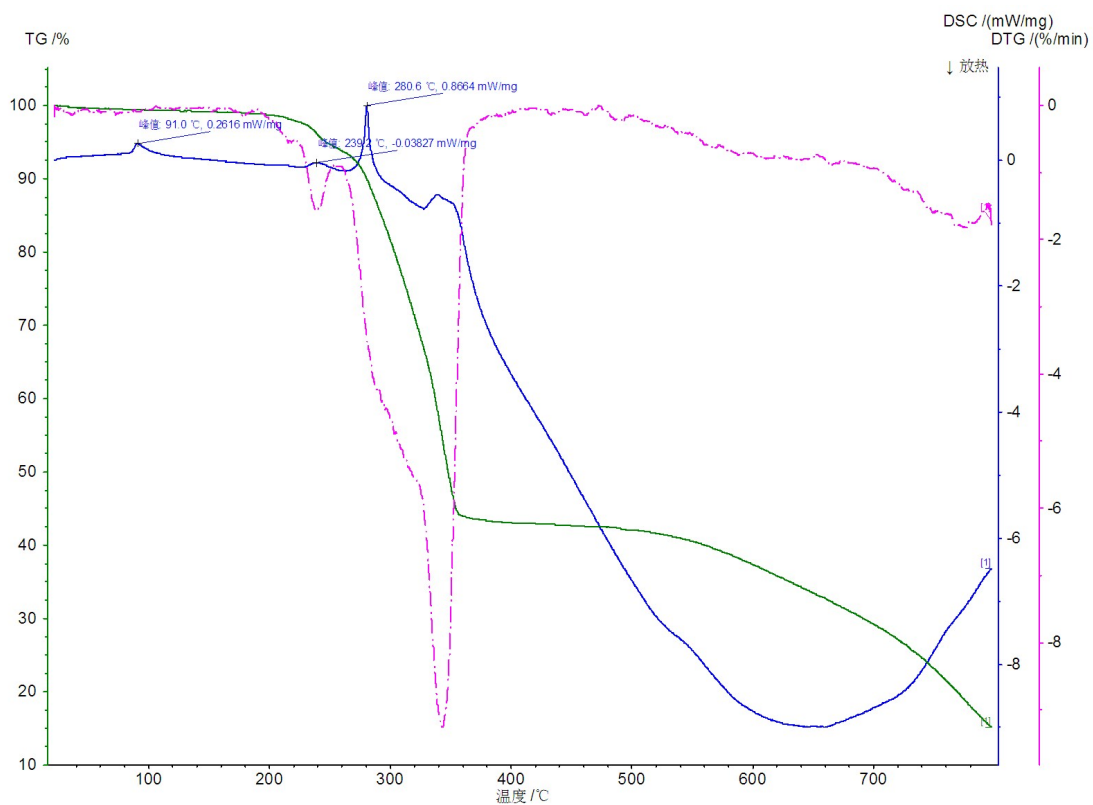

Figure S15 TGA-DSC of C

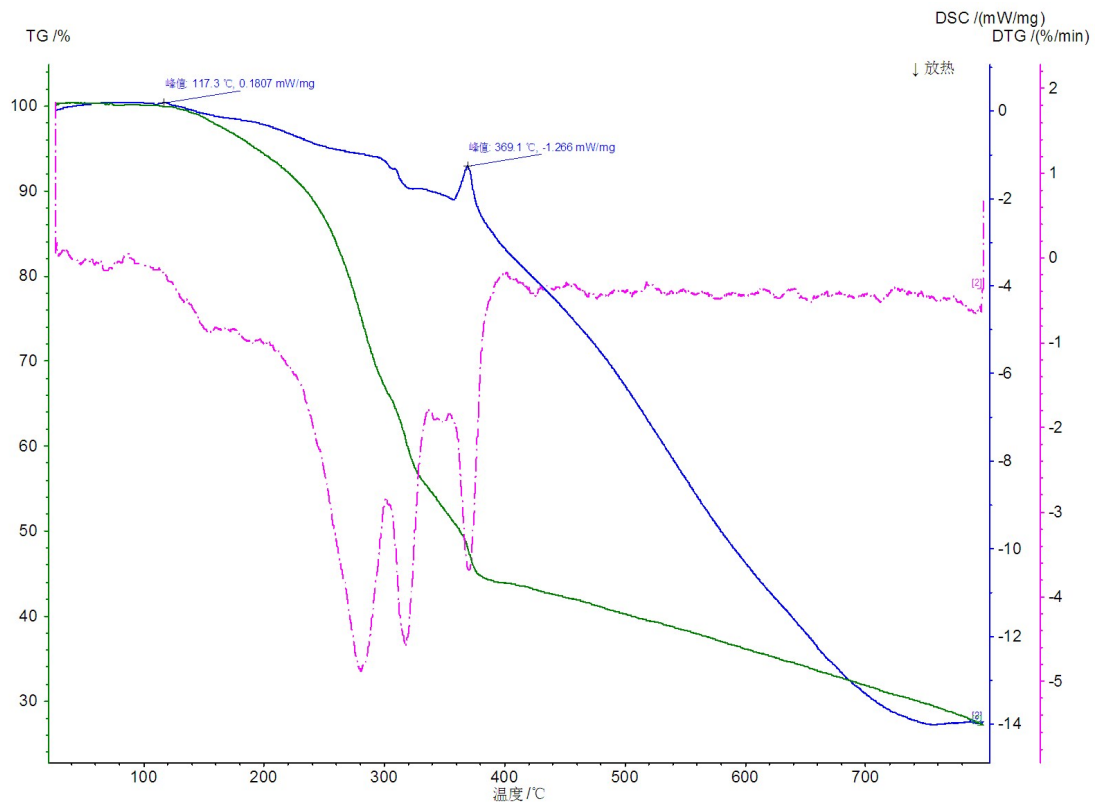

Figure S16 TGA-DSC of D

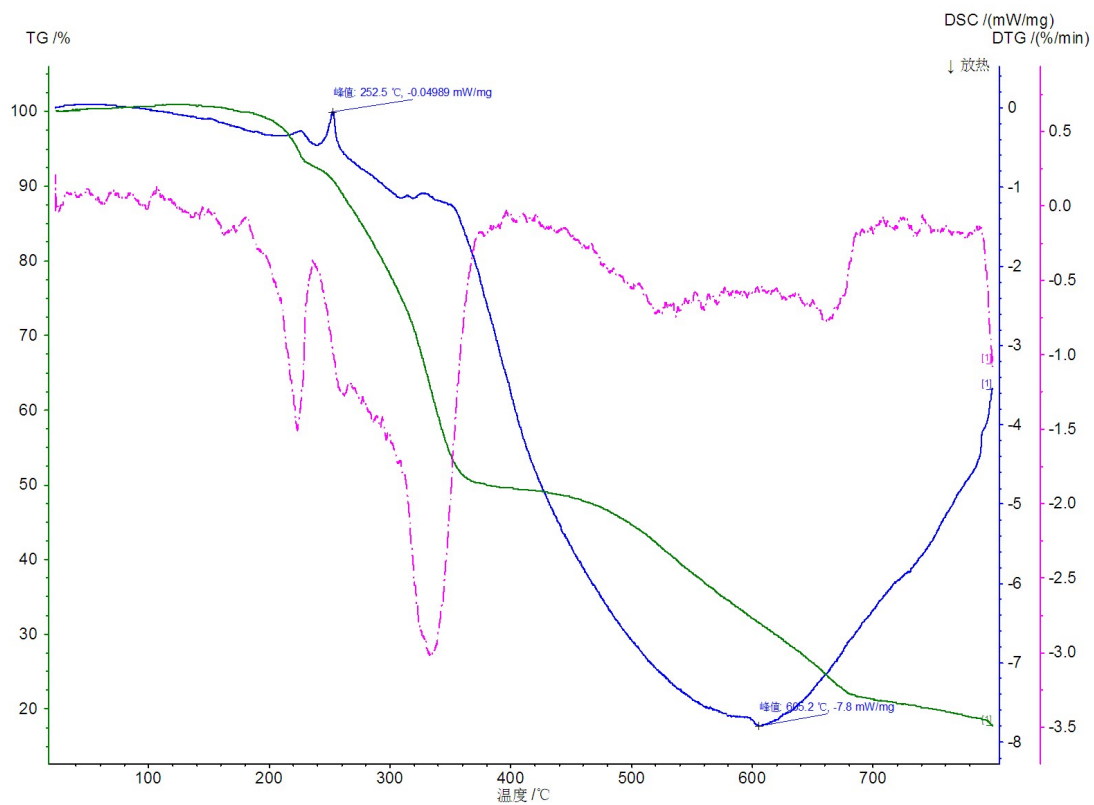

Figure S17 TGA-DSC of E

### 3. <sup>1</sup>H NMR of part compounds

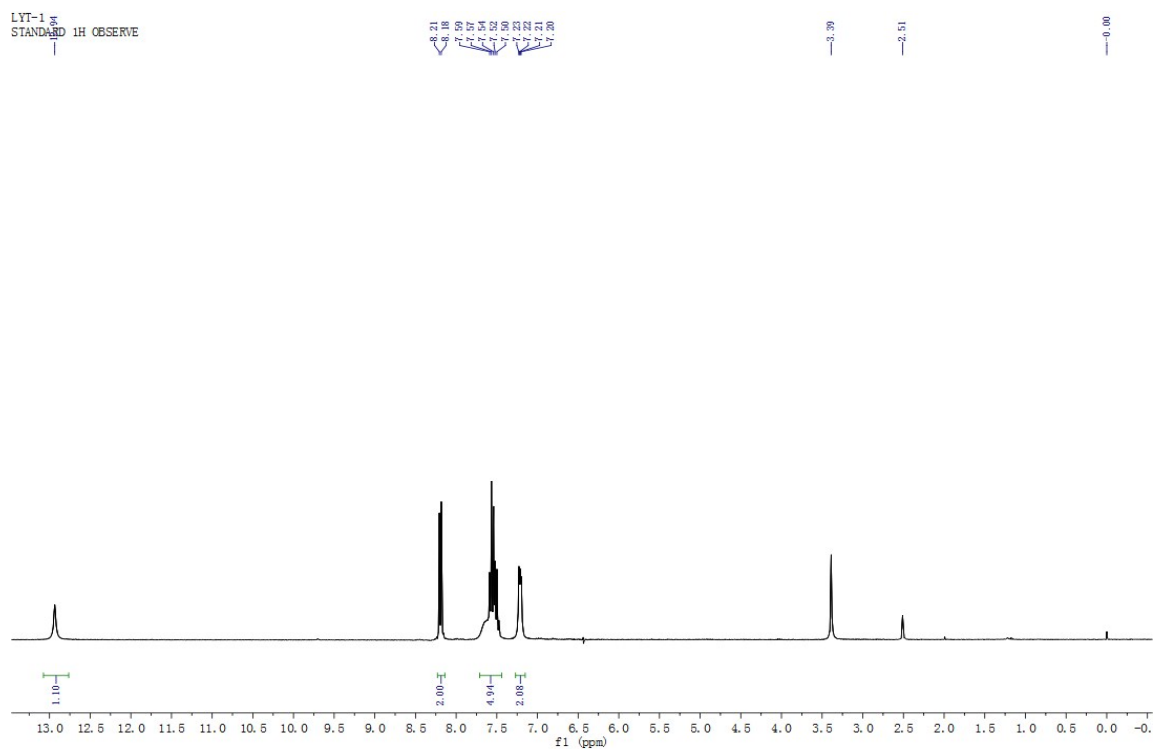

<sup>1</sup>H NMR 2-phenyl-1H-benzo[d]imidazole (**3a**)

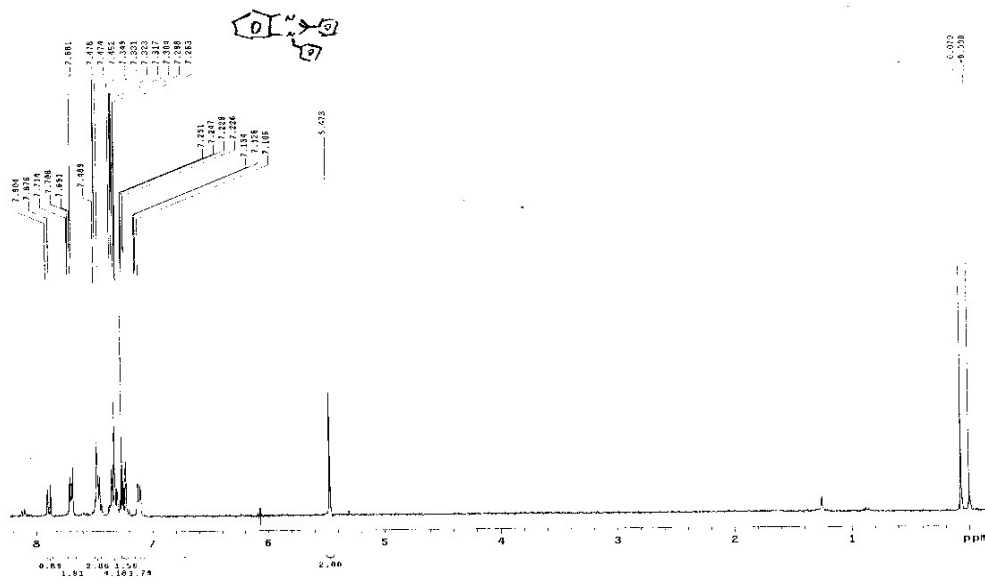

<sup>1</sup>H NMR 1-benzyl-2-phenyl-1H-benzo[d]imidazole (4a)

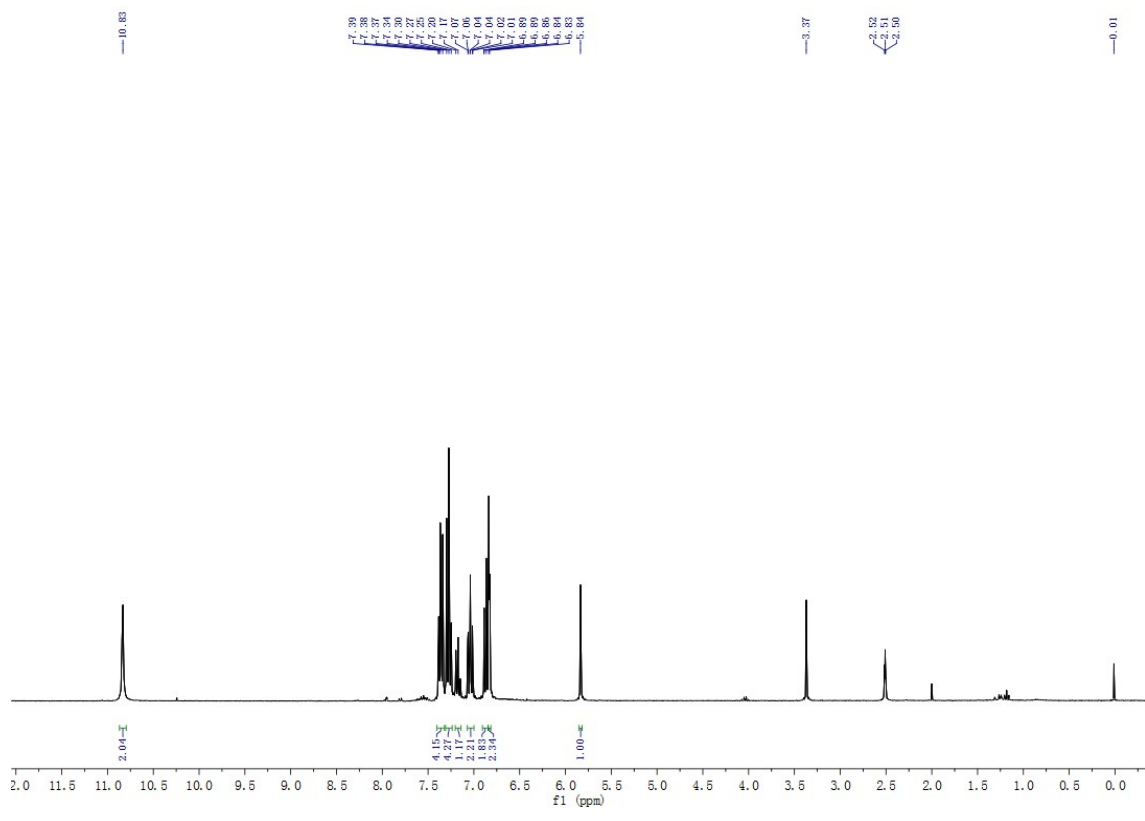

<sup>1</sup>H NMR 3,3'-(phenylmethylene)bis(1H-indole) (6a)
